# Supplementary material for: The interaction between ΔNp63α and TAp63α, mediated by miR-205-5p, inhibits the migration of lung adenocarcinoma cells
Source: Springer Nature journal article supplement (doi:10.1038/s41598-025-95206-4), 2025-04-03
Supplement: MOESM1 [file 41598_2025_95206_MOESM1_ESM.pdf]

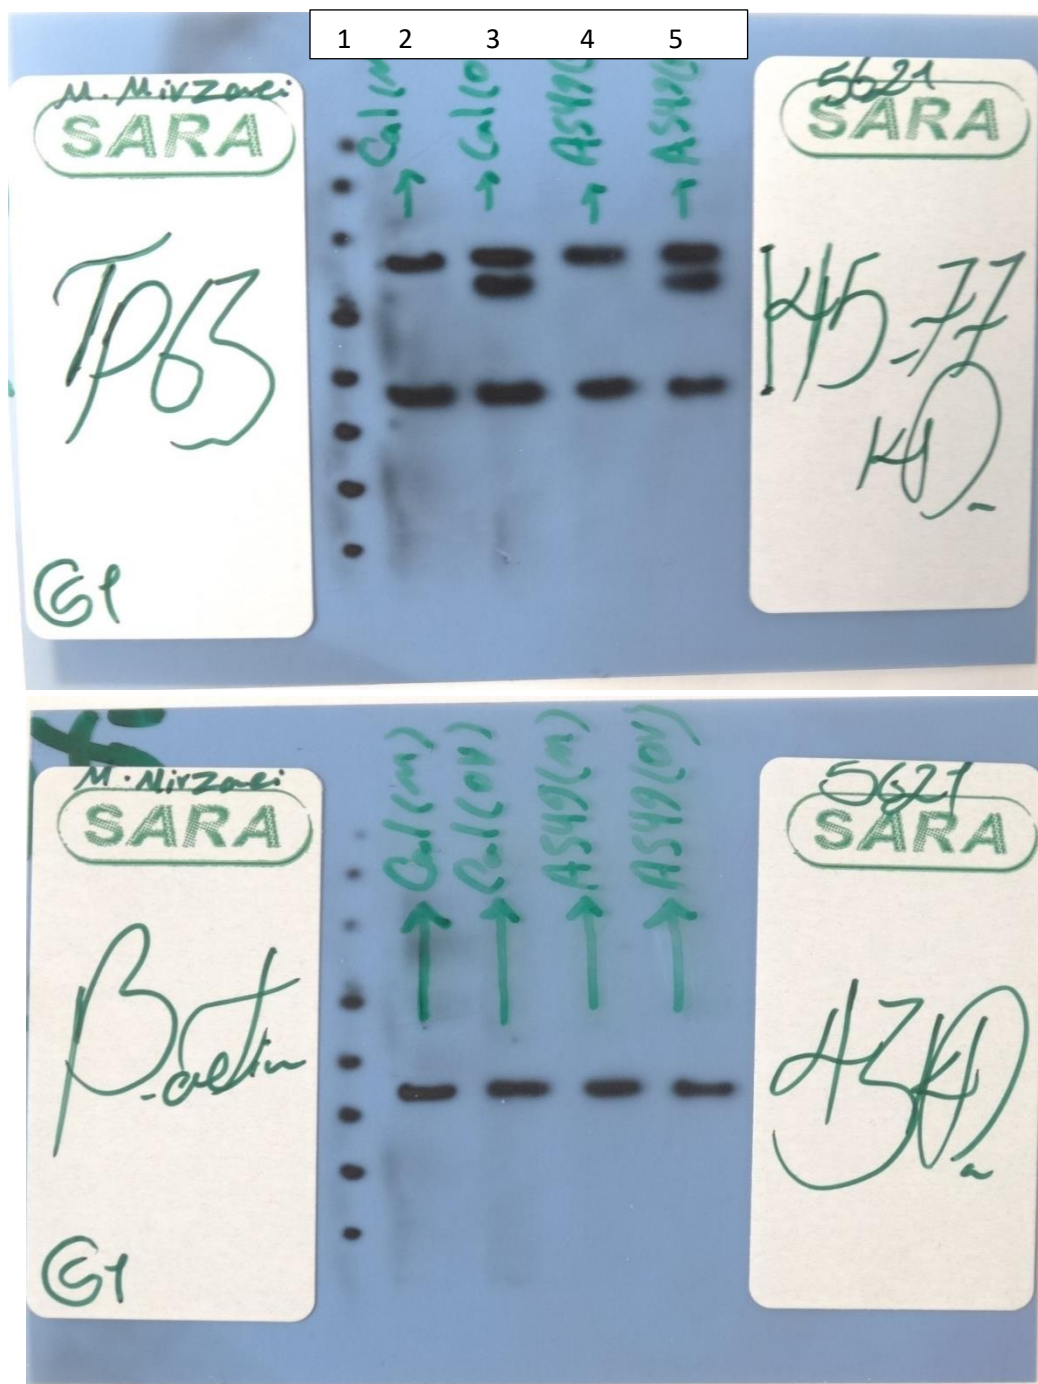

**Figure 3c, f: Western blot analysis of TP63 expression following  $\Delta$ Np63 $\alpha$  overexpression in Calu-6 and A549 cells.** Western blot images showing the expression of TP63 isoforms in Calu-6 and A549 cell lines. Lane 1: Molecular weight marker, Lane 2: Calu-6 cells transfected with pcDNA-Mock, Lane 3:  $\Delta$ Np63 $\alpha$  overexpression in Calu-6 cells, Lane 4: A549 cells transfected with pcDNA-Mock, Lane 5:  $\Delta$ Np63 $\alpha$  overexpression in A549 cells. Results indicate that TAp63 expression increases in both cell lines upon  $\Delta$ Np63 $\alpha$  overexpression.

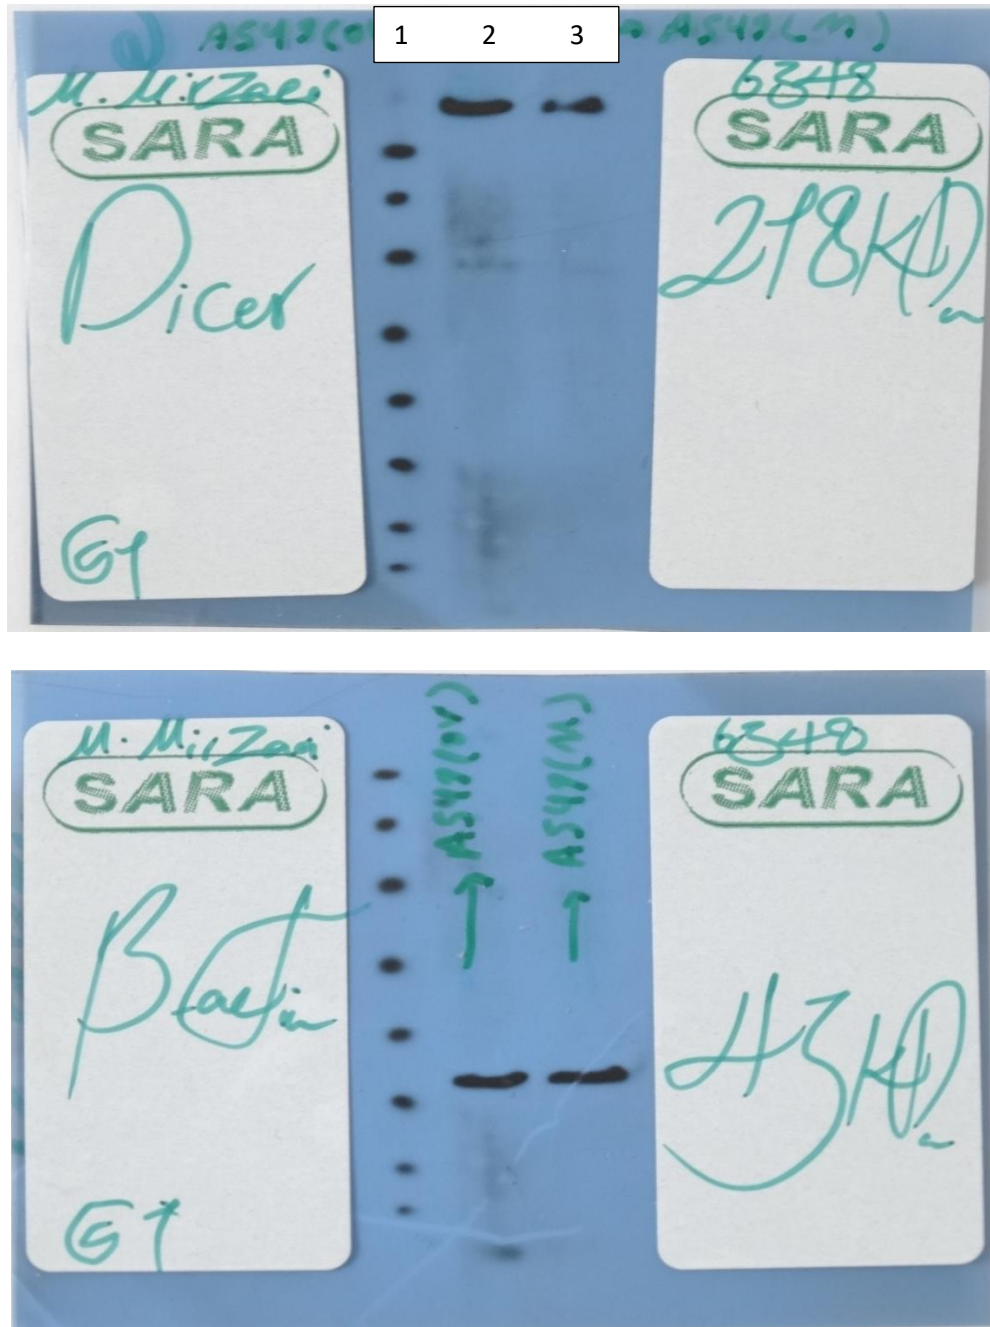

**Figure 3g: Western blot analysis of DICER expression following  $\Delta Np63\alpha$  overexpression in A549 cells.** Western blot images showing the expression of DICER in A549 cells. Lane 1: Molecular weight marker, Lane 2:  $\Delta Np63\alpha$  overexpression in A549 cells, Lane 3: pcDNA-Mock in A549 cells. Results indicate that  $\Delta Np63\alpha$  overexpression leads to increased expression of DICER.

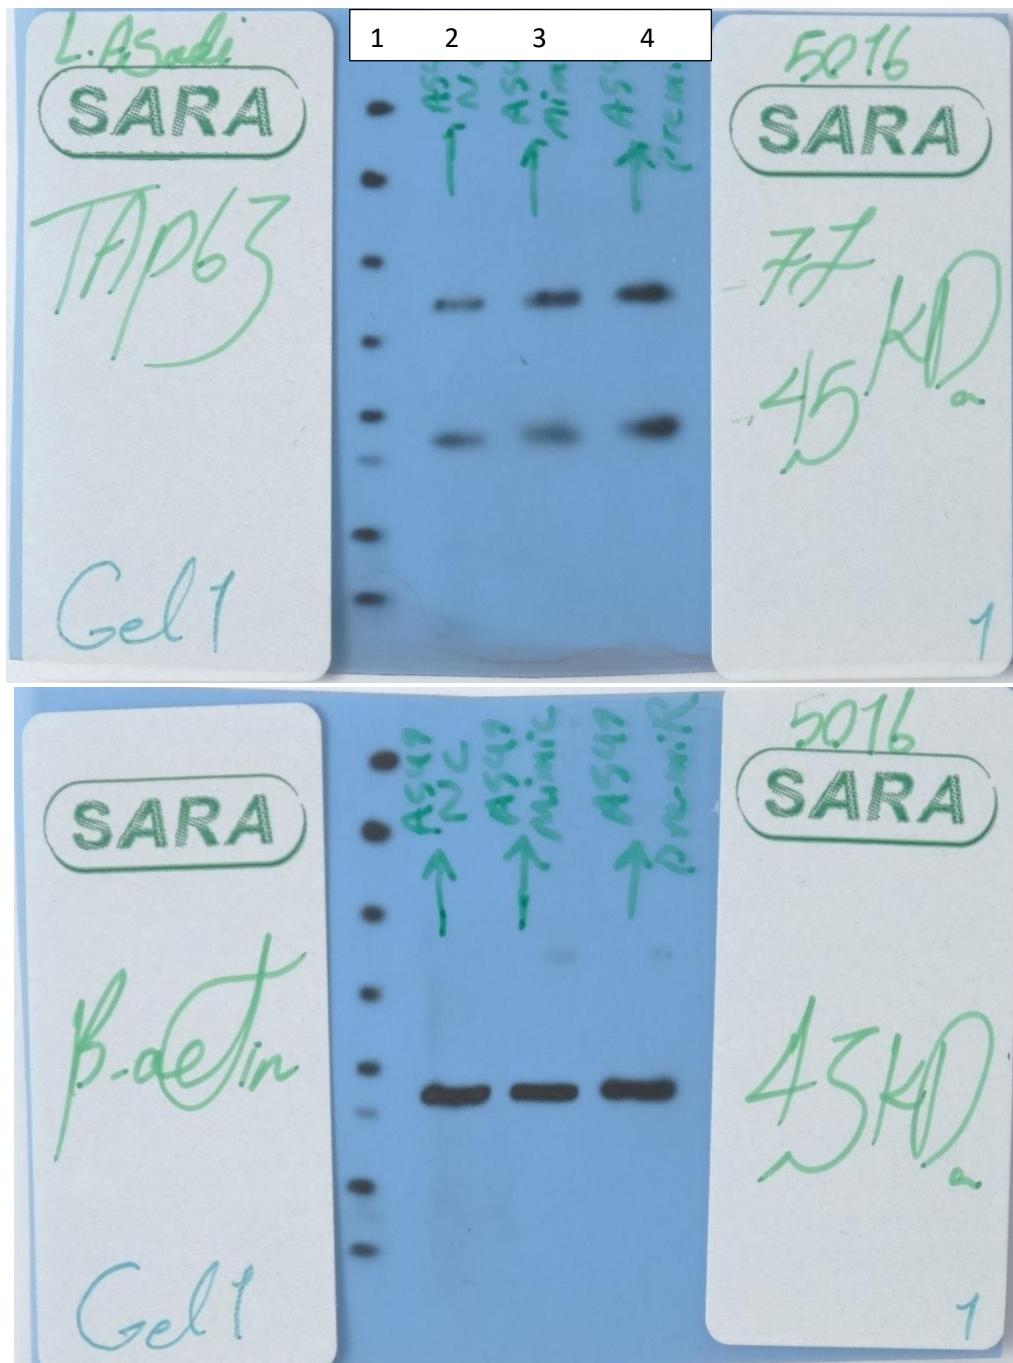

**Figure 5e: Western blot analysis of Tap63 expression in A549 cells transfected with miR-205-5p mimic and negative control.** Western blot images showing the expression of Tap63 in A549 cells. Lane 1: Molecular weight marker, Lane 2: A549 cells transfected with a negative control, Lane 3: A549 cells transfected with miR-205-5p mimic, Lane 4: A549 cells transfected with a pre-miR-205-expressing vector (not used for analysis in this study). Results demonstrate that transfection with miR-205-5p mimic leads to increased expression of Tap63.



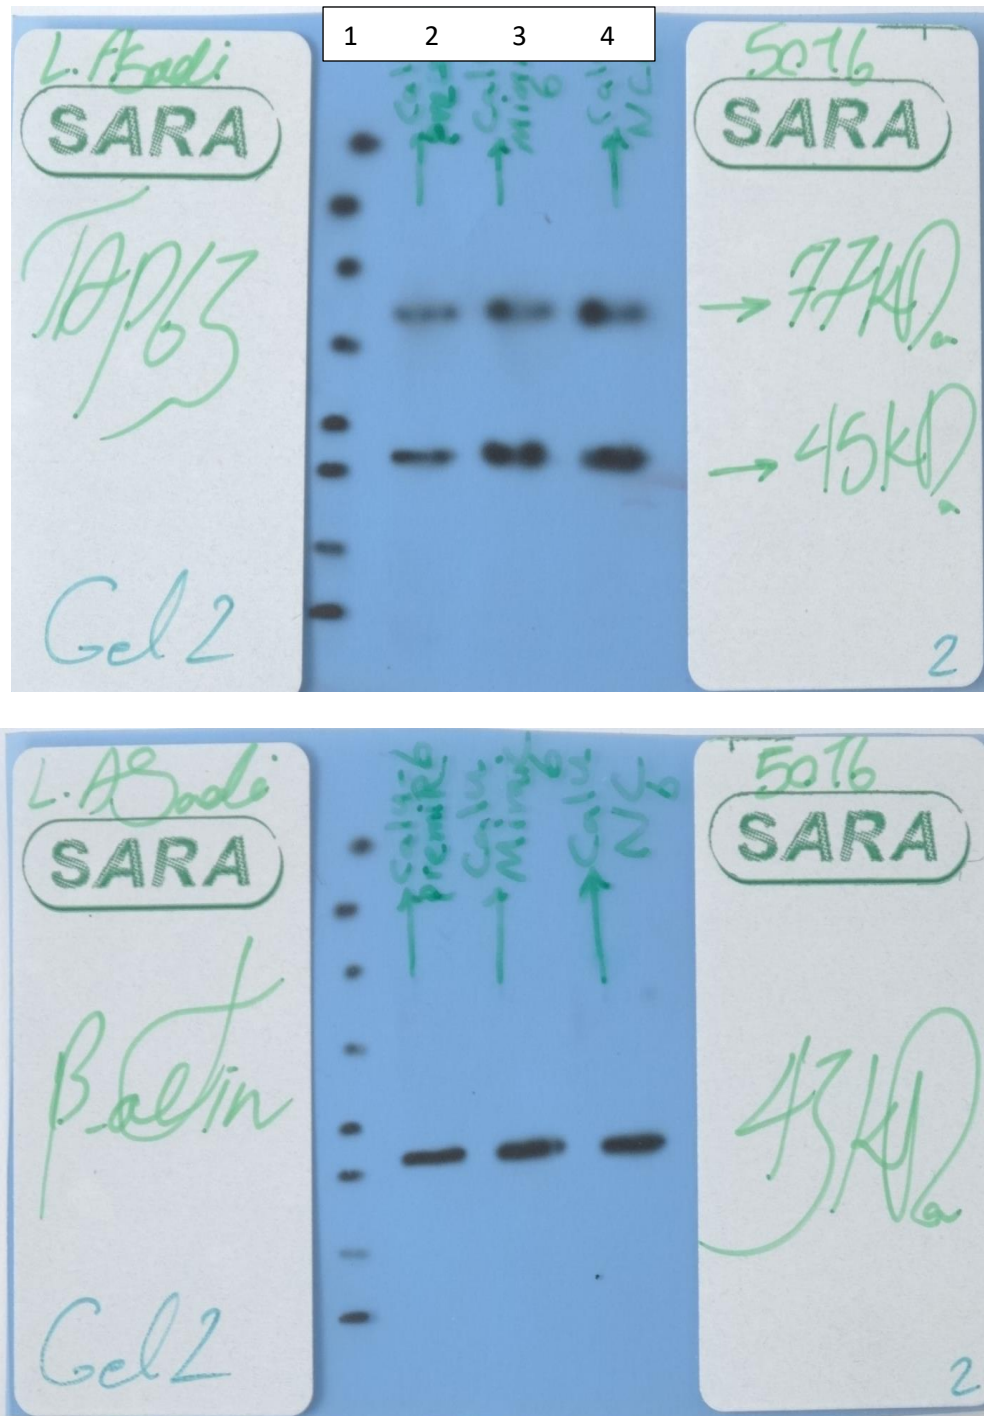

**Figure 5e: Western blot analysis of TAp63 expression in Calu-6 cells transfected with miR-205-5p mimic and negative control.** The western blot results demonstrate the effect of miR-205-5p mimic on the expression of TAp63 in Calu-6 cells. Lane 1: Molecular weight marker, Lane 2: Calu-6 cells transfected with a pre-miR-205-expressing vector (not used for analysis in this study), Lane 3: Calu-6 cells transfected with miR-205-5p mimic, Lane 4: Calu-6 cells transfected with a negative control. Results indicate that transfection with miR-205-5p mimic leads to a reduction in TAp63 expression.

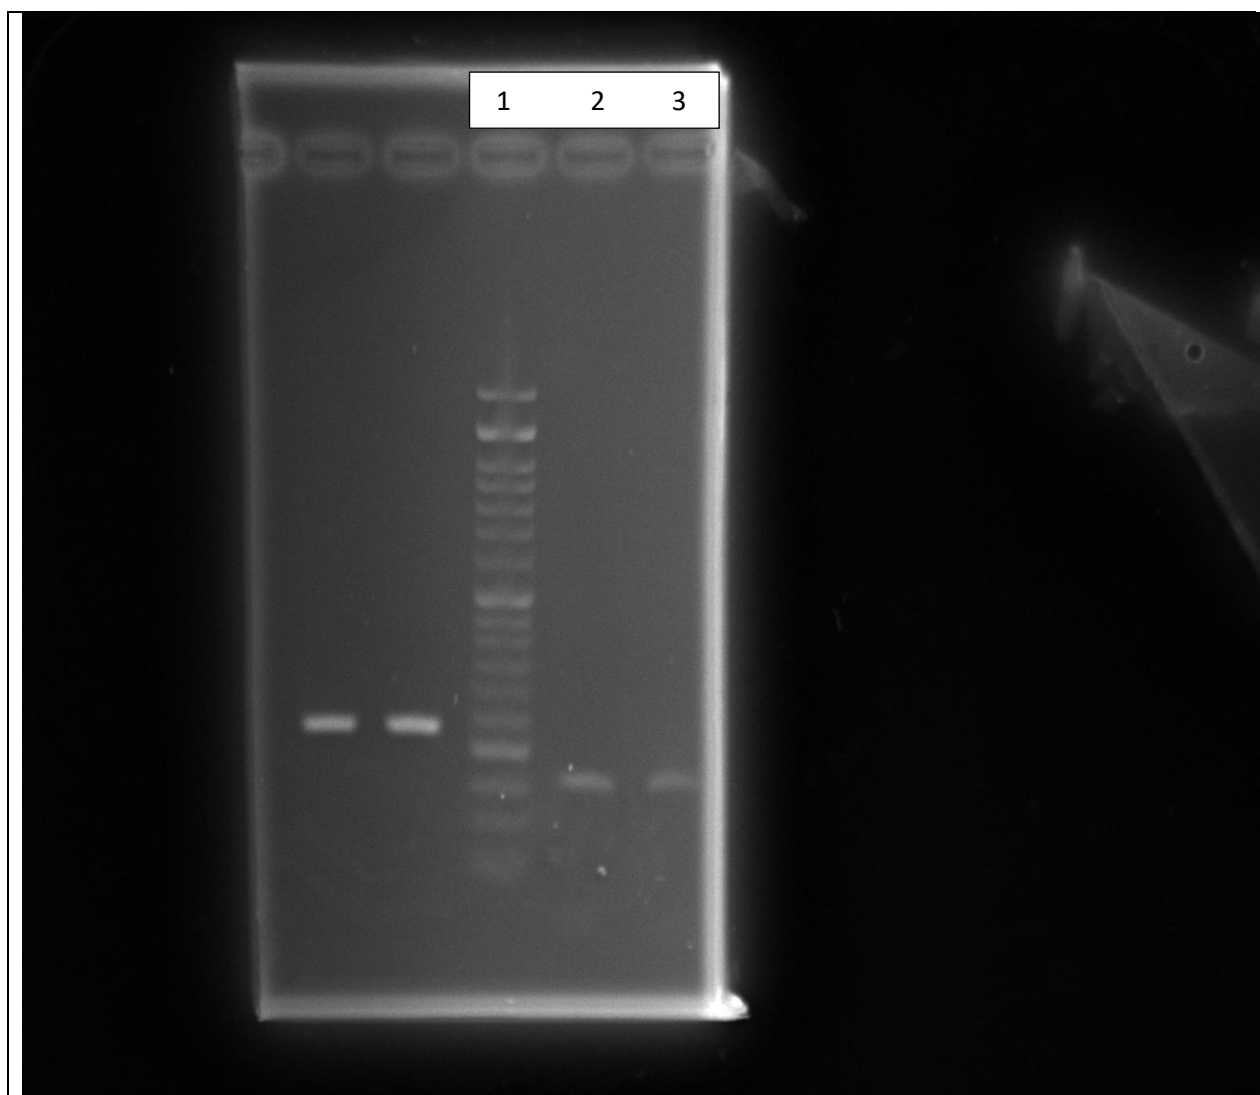

**Figure 7b: Agarose gel of 148bp fragment (using specific real-time PCR primers).** Lane 1: 50bp DNA ladder. Lane 2: Amplified fragment using A549 cDNA. Lane 3: Amplified fragment using Calu-6 cDNA. The results of the other lanes were not used in this study.

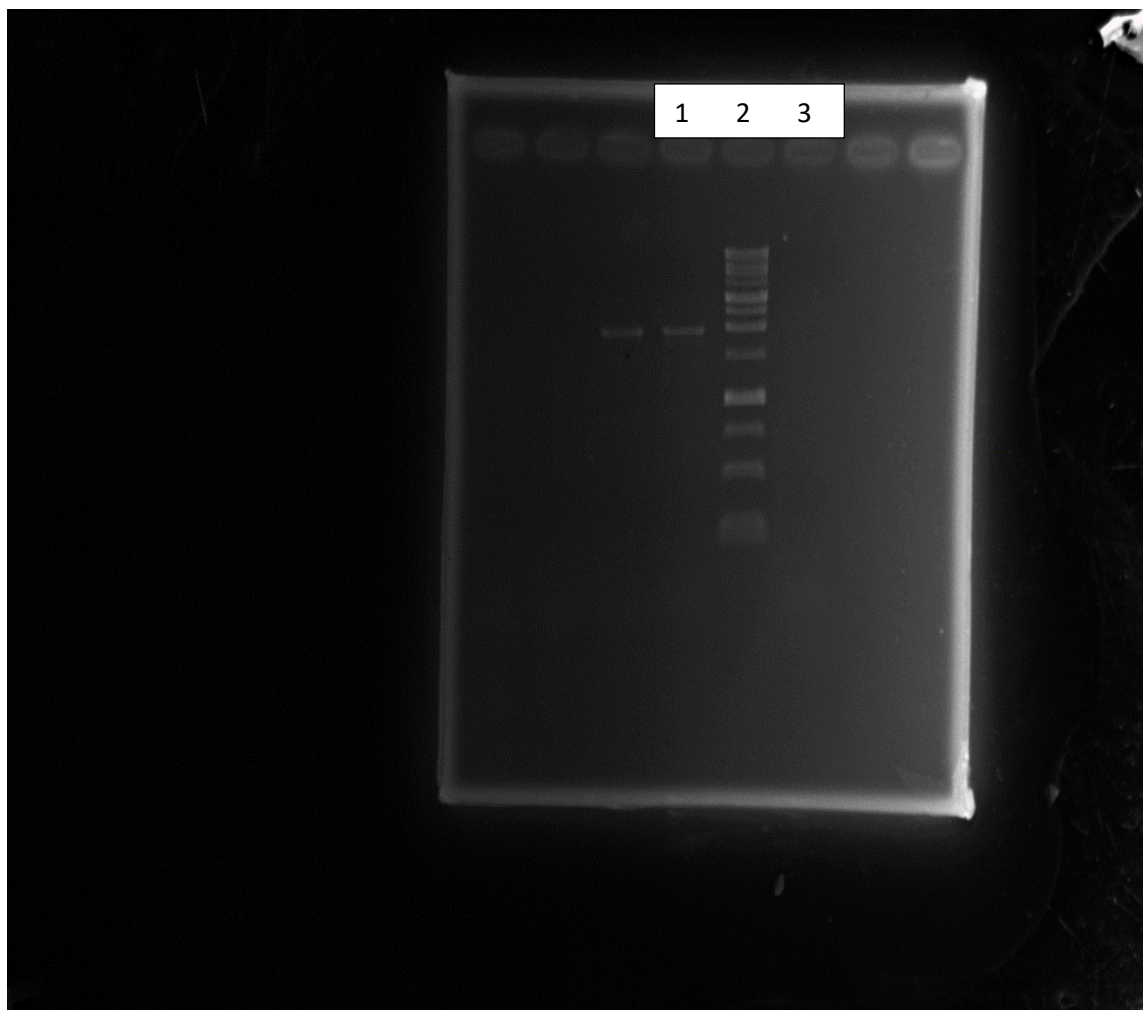

**Figure 7c: Agarose gel of 2000bp fragment (amplified using CDS-specific primers).**Lane 1: Amplified fragment using A549 cDNA.Lane 2: 1kb DNA ladder. Lane 3: Amplified fragment using Calu-6 cDNA. The results of the other lanes were not used in this study.

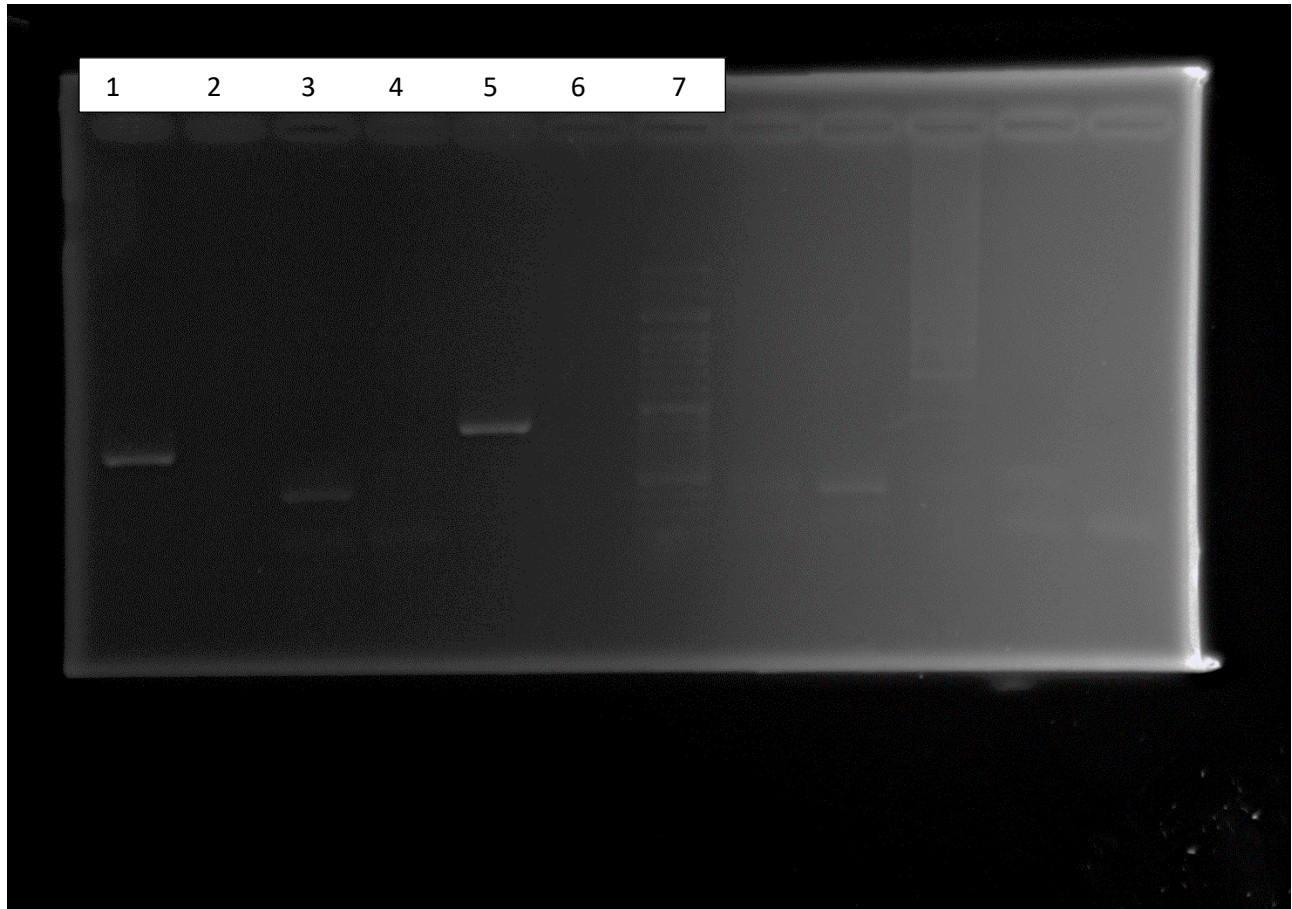

**Figure 7d: Agarose gel of 323bp, 155bp, and 412bp fragments (amplified using exon1-specific primers).** Lane 1, 3, 5: Amplified fragment using A549 cDNA. Lane 2, 4, 6: Amplified fragment using Calu-6 cDNA. Lane 7: 50bp DNA ladder. The results of the other lanes were not used in this study.
